# Supplementary material
Source: MDPI journal article supplement (https://www.mdpi.com/2075-5309/13/2/476)
Supplement: s1 [file s1]

**File S5**

Detailed profiles of valid interview experts.

Table 1. Detailed profiles of valid interview experts.

| <b>Individual<br/>Characteristics</b> | <b>Items</b>             | <b>Percentage<br/>(%)</b> |
|---------------------------------------|--------------------------|---------------------------|
| Gender                                | Male                     | 57.69%                    |
|                                       | Female                   | 42.31%                    |
| Occupation                            | College teacher          | 19.23%                    |
|                                       | Government employee      | 3.85%                     |
|                                       | Manager of an enterprise | 46.15%                    |
|                                       | Other                    | 30.77%                    |
| Working<br>experience                 | More than 5 years        | 19.23%                    |
|                                       | 3 to 5 years             | 15.39%                    |
|                                       | 1 to 3 years             | 26.92%                    |
|                                       | Less than 1 year         | 38.46%                    |
| Education<br>level                    | Doctorate degree         | 19.23%                    |
|                                       | Master's degree          | 50.00%                    |
|                                       | Other                    | 30.77%                    |
