# Supplementary material
Source: MDPI journal article supplement (https://www.mdpi.com/2075-5309/13/2/476)
Supplement: s1 [file s1]

Archive with 5 entries (5 files):
- File S1-Detailed information about the evaluation indicator system of smart community safety.pdf
- File S2-Questionnaire about assessment of smart community safety.pdf
- File S3-Detailed evaluation criteria for each indicator of smart community safety.pdf
- File S4-The rankings of the five smart communities on each indicator.pdf
- File S5-Detailed profiles of valid interview experts..pdf
