# Supplementary material
Source: MDPI journal article supplement (https://www.mdpi.com/2075-5309/13/2/476)
Supplement: s1 [file s1 › File S1-Detailed information about the evaluation indicator system of smart community safety.pdf]

**Table S-1.** Detailed information about the evaluation indicator system of smart community safety

| Dimension                         | Indicators                   | Code | Description                                                                                                                                                                                                                                                                                                                                                 |
|-----------------------------------|------------------------------|------|-------------------------------------------------------------------------------------------------------------------------------------------------------------------------------------------------------------------------------------------------------------------------------------------------------------------------------------------------------------|
| Safeguard mechanism (SM)          | Organizational safeguard     | SE11 | The leading organization responsible for the safety work in this community is determined, and the organization and leadership of the safety work in smart communities are strengthened.                                                                                                                                                                     |
|                                   | Capital safeguard            | SE12 | Special capital is invested in the renewal of smart communities, the construction, and operation of smart safety facilities, etc.                                                                                                                                                                                                                           |
|                                   | Institutional safeguard      | SE13 | The rules and regulations of smart community safety implementation are developed, and community safety management has been carried out.                                                                                                                                                                                                                     |
|                                   | Talent safeguard             | SE14 | A team of professionals with technical, and administrative abilities are built in the smart community, and a team of volunteers with knowledge of smart community safety management is built.                                                                                                                                                               |
|                                   | Operation safeguard          | SE15 | Standardized and complete electronic work files are established to record daily patrol inspections, major maintenance, major events, emergency exercises, propaganda and education activities in smart communities.                                                                                                                                         |
| Platform safety (PS)              | Information safety safeguard | SE21 | The safety system is a requirement for physical safety, network safety, data safety, and application safety of the system to protect the confidentiality, integrity, reliability, and availability of the system and its information.                                                                                                                       |
|                                   | Platform data safety         | SE22 | A perfect data safety system is established which has the ability of data safety technology, and can encrypt and store key data.                                                                                                                                                                                                                            |
|                                   | Platform access safety       | SE23 | Platform access is realized through a unified identity authentication service, and multi-role access rights are set to protect user information safety.                                                                                                                                                                                                     |
| Execution of Emergency plans (EP) | Emergency plan implementing  | SE31 | According to the emergency plan formulated by the superior department and the characteristics of the community, the relevant content of the emergency plan is implemented, including community disaster and risk management organization, disaster risk and hidden danger list, disaster disposal process, community contact information, rescue team, etc. |
|                                   | Emergency exercise           | SE32 | Emergency exercises with communication guarantee and personnel evacuation as the main contents in emergencies were carried out. In addition, the participation of smart community residents, enterprises and institutions, social                                                                                                                           |

| Dimension                     | Indicators                            | Code | Description                                                                                                                                                                                                                                                                                                                                                                                                                                                                                                                               |
|-------------------------------|---------------------------------------|------|-------------------------------------------------------------------------------------------------------------------------------------------------------------------------------------------------------------------------------------------------------------------------------------------------------------------------------------------------------------------------------------------------------------------------------------------------------------------------------------------------------------------------------------------|
| Community public safety (CPS) |                                       |      | organizations, and volunteers in emergency exercises is counted.                                                                                                                                                                                                                                                                                                                                                                                                                                                                          |
|                               | Abnormal events recording             | SE41 | An abnormal events recording mechanism is established to record all kinds of accidents in the jurisdiction, including drug abuse and disputes.                                                                                                                                                                                                                                                                                                                                                                                            |
|                               | Special population management         | SE42 | The basic information and behaviors of key people in the community are carefully managed, including mental patients, ex-prisoners, and key drug addicts, and the digital supervision of all kinds of special people is strengthened.                                                                                                                                                                                                                                                                                                      |
|                               | Multi-sectoral linkage                | SE43 | With the combination of online and offline, a multi-sectoral linkage mechanism of the smart community (Ministry of Housing and Urban-Rural Development, Fire Department, Ministry of Public Security, etc.) is established to realize the rapid handling of emergencies.                                                                                                                                                                                                                                                                  |
|                               | Public health events processing       | SE44 | During the epidemic period of major infectious diseases, the community working group shall establish a protection working mechanism according to relevant regulations and set up a grass-roots public health emergency response working group. The working groups carry out personnel investigation, medical observation, health management, collection, reporting of related information, etc. The database of public health incident handling is established, and the information is connected with the community information platform. |
|                               | Management and control of key parts   | SE45 | Smart information technology is used to realize information collection, monitoring, and comprehensive management of key parts such as roads, public places and violation housing in the smart community.                                                                                                                                                                                                                                                                                                                                  |
| Smart infrastructure (SI)     | Building monitoring                   | SE46 | The unmanned aerial vehicle, information sensors, big data, and other technologies are adopted to dynamically supervise the safety of building structures, and the monitoring system can realize timely warnings when there are problems in the safety of building structures.                                                                                                                                                                                                                                                            |
|                               | Life channel facilities monitoring    | SE51 | Smart monitoring equipment is set at the life passage of the smart community, which helps to check and upload the data of fire truck passages, evacuation passages, safety exits, and other facilities in residential buildings at all times.                                                                                                                                                                                                                                                                                             |
|                               | Smart personnel monitoring facilities | SE52 | The flow of people in the community is monitored in real-time, and the characteristic data of people is collected. The traffic data has the function of analysis and statistics, the historical records can be checked, and the data is stored safely.                                                                                                                                                                                                                                                                                    |

| Dimension              | Indicators                         | Code | Description                                                                                                                                                                                                                                                                                                                                                                      |
|------------------------|------------------------------------|------|----------------------------------------------------------------------------------------------------------------------------------------------------------------------------------------------------------------------------------------------------------------------------------------------------------------------------------------------------------------------------------|
|                        | Smart object monitoring facilities | SE53 | Motor vehicles, high-altitude parabolic monitoring, burglar equipment, and other aspects in the community are monitored by installing electronic equipment for safety monitoring. The abnormal situation can be reported to the police in time, which is helpful to prevent the occurrence of major safety accidents in the community.                                           |
|                        | Integrated system of smart safety  | SE54 | The data of each item will be collected and counted, and a centralized information system will be built according to the statistical data for community residents to use.                                                                                                                                                                                                        |
|                        | Public facilities monitoring       | SE55 | The running state of some public facilities is smartly monitored by the Internet of Things technology, and an alarm is generated in time when an abnormality is found.                                                                                                                                                                                                           |
|                        | Smart environment monitoring       | SE56 | By means of information technology, community administrators or residents can upload community environmental problems in time through mobile clients to ensure the timely disposal of community environmental problems.                                                                                                                                                          |
|                        | Smart firefighting facilities      | SE57 | Smart fire-fighting facilities in the community are built, including smart fire hydrants, fire location systems, smart alarm devices, automatic fire-fighting devices, etc. Smart fire-fighting system is set up to realize the timely treatment of fire-fighting incidents.                                                                                                     |
| Emergency measure (EM) | Emergency duty                     | SE61 | The emergency workstation is set up, which is equipped with a smart emergency management system and emergency duty terminal. Relevant information is connected to the smart community emergency management duty system, and a normalized emergency team is set up to carry out community safety monitoring and early warning.                                                    |
|                        | Emergency warning                  | SE62 | Extreme weather, people's dangerous behaviors, and natural disasters in the community are monitored and warned by means of information technology to ensure that accidents can be warned and solved in time.                                                                                                                                                                     |
|                        | Emergency rescue alarm             | SE63 | The emergency rescue alarm system is built, and emergency help buttons and emergency communication devices with property management center and emergency control center are set up in community public areas. Emergency rescue alarm is set indoors to help community residents get in touch with medical institutions in time and push alarm information to emergency contacts. |
|                        | Emergency shelter guidelines       | SE64 | Emergency shelter functional zoning map, emergency evacuation route map, and emergency shelter sign are made, which are displayed in the                                                                                                                                                                                                                                         |

| Dimension                             | Indicators                                   | Code | Description                                                                                                                                                                                                                                                                                                                                                                                                                                                                                                                                                                                                                                              |
|---------------------------------------|----------------------------------------------|------|----------------------------------------------------------------------------------------------------------------------------------------------------------------------------------------------------------------------------------------------------------------------------------------------------------------------------------------------------------------------------------------------------------------------------------------------------------------------------------------------------------------------------------------------------------------------------------------------------------------------------------------------------------|
|                                       | Emergency supplies reserve                   | SE65 | <p>most obvious position in the community. Meanwhile, relevant information about the emergency shelter is uploaded to the smart community information platform so that when an emergency happens, residents can quickly reach the nearest emergency shelter through the platform and emergency broadcast guidance. By means of information technology, emergency supplies are monitored dynamically, the information on emergency supplies reserve is fed back to community administrators in time, and the information of residents is displayed on the platform so that emergency supplies reserve can be quickly gained when an emergency occurs.</p> |
|                                       | Emergency command and dispatch               | SE66 | <p>Community emergency service resources are integrated, including police, medical care, volunteers, and social emergency forces. The corresponding emergency rescue service dispatching mechanism is provided to community residents.</p>                                                                                                                                                                                                                                                                                                                                                                                                               |
|                                       | Disaster risk map                            | SE67 | <p>Disaster risk identification and assessment in smart communities are carried out regularly, and disaster risk maps are drawn. The map can clearly show the risk events in the community and help the community work to carry out related work.</p>                                                                                                                                                                                                                                                                                                                                                                                                    |
| Safety propaganda and education (SPE) | Propaganda and education of emergency safety | SE71 | <p>Safety knowledge is publicized through radio, television, the Internet, electronic displays, etc. Communities regularly open propaganda and education sites for safety knowledge, and provide propaganda and education services for students, the elderly, the disabled, etc., especially training and publicity for risk avoidance skills.</p>                                                                                                                                                                                                                                                                                                       |
|                                       | Training of community administrators         | SE72 | <p>Knowledge and skills training activities of smart community safety management and emergency management are carried out for community administrators and property personnel.</p>                                                                                                                                                                                                                                                                                                                                                                                                                                                                       |
