# Supplementary material
Source: MDPI journal article supplement (https://www.mdpi.com/2075-5309/13/2/476)
Supplement: s1 [file s1 › File S2-Questionnaire about assessment of smart community safety.pdf]

## File S2

### Questionnaire about assessment of smart community safety

Dear experts,

Thank you for participation in the questionnaire survey. This is the research team from Department Engineering Management of School of Mechanics and Civil Engineering, China University of Mining and Technology by Prof. Linxiu Wang and Lecturer Tianntian Gu.

This interview focuses on how to evaluate the smart community safety level by considering the multi-level evaluation indicators. The multi-level assessment system has been developed as shown in Figure B-1. Now, we try to determine the weights of indicators based on your valuable opinions. Please mark in Table B-1~B-8 according to your knowledge and experience.

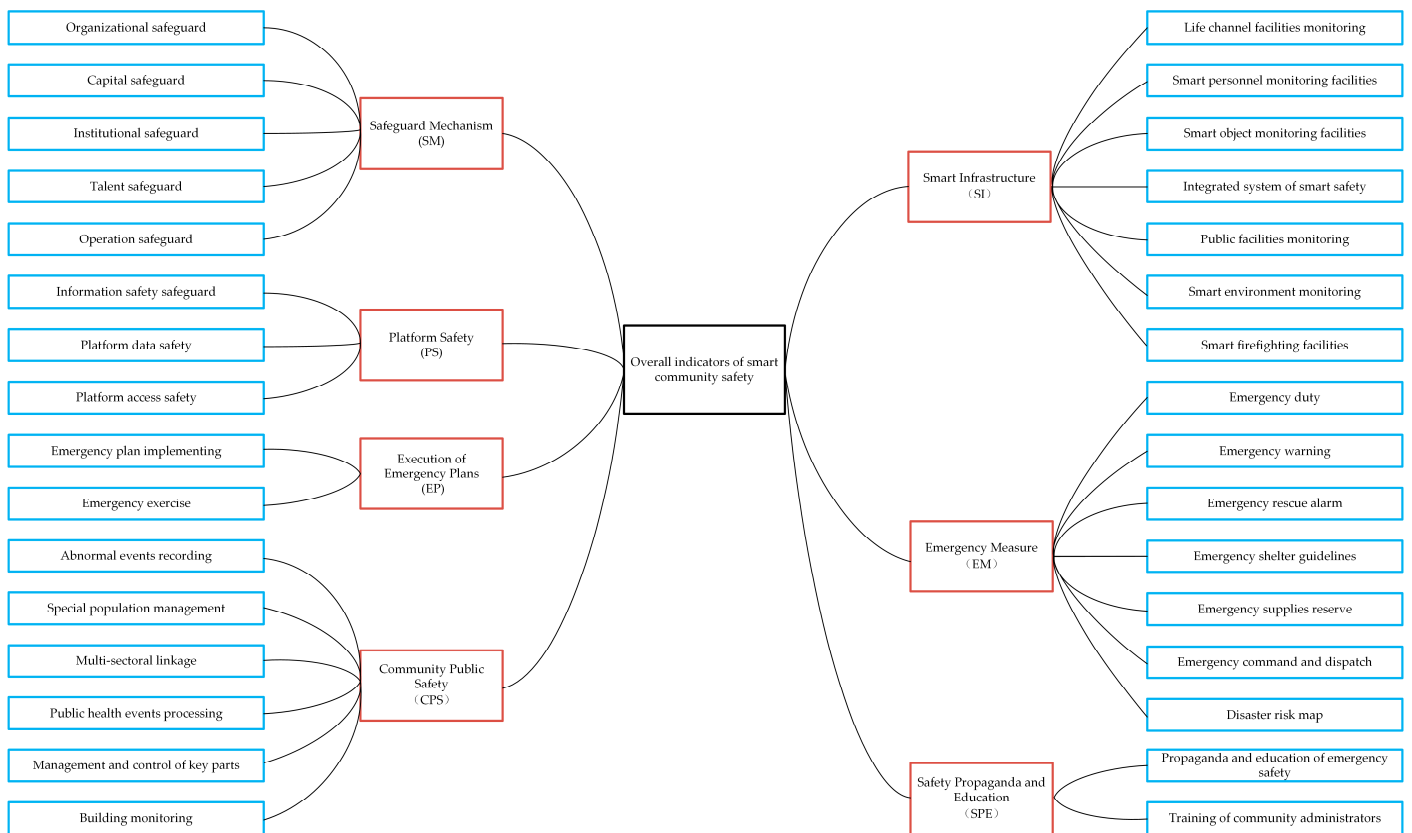

**Figure B-1.** The assessment indicators of smart community safety.

### 1. Basic information of the expert.

**Table B-1.** Basic information of the expert.

| Individual characteristics | Items             | Symbol (√) |
|----------------------------|-------------------|------------|
| Gender                     | Male              |            |
|                            | Female            |            |
| Education level            | Doctorate degree  |            |
|                            | Master's degree   |            |
|                            | Others            |            |
| Working experience         | More than 5 years |            |
|                            | 3 to 5 years      |            |

| Individual characteristics | Items                     | Symbol (√) |
|----------------------------|---------------------------|------------|
|                            | 1 to 3 years              |            |
|                            | Less than 1 year          |            |
| Occupation                 | College teacher           |            |
|                            | Government employee       |            |
|                            | Manager of the enterprise |            |
|                            | Others                    |            |

## 2. Selecting and determining the evaluation indicators of smart community governance.

Please mark Table B-2 according to your knowledge and experience. Ranging from 1 (very unimportant) to 5 (very important). '√' is used for marking. In particular, new indicators suggested by the expert can be added at the bottom of Table B-2 and the corresponding score can be given by marking '√'.

**Table B-2.** The questionnaire for selecting evaluation indicators of smart community governance and determining their weights.

| Dimension                         | Indicators                            | Code | Scoring |   |   |   |   |
|-----------------------------------|---------------------------------------|------|---------|---|---|---|---|
|                                   |                                       |      | 1       | 2 | 3 | 4 | 5 |
| Safeguard Mechanism (SE)          | Organizational safeguard              | SE11 |         |   |   |   |   |
|                                   | Capital safeguard                     | SE12 |         |   |   |   |   |
|                                   | Institutional safeguard               | SE13 |         |   |   |   |   |
|                                   | Talent safeguard                      | SE14 |         |   |   |   |   |
|                                   | Operation safeguard                   | SE15 |         |   |   |   |   |
| Platform Safety (PS)              | Information safety safeguard          | SE21 |         |   |   |   |   |
|                                   | Platform data safety                  | SE22 |         |   |   |   |   |
|                                   | Platform access safety                | SE23 |         |   |   |   |   |
| Execution of Emergency Plans (EP) | Emergency plan implementing           | SE31 |         |   |   |   |   |
|                                   | Emergency exercise                    | SE32 |         |   |   |   |   |
| Community Public Safety (CPS)     | Abnormal events recording             | SE41 |         |   |   |   |   |
|                                   | Special population management         | SE42 |         |   |   |   |   |
|                                   | Multi-sectoral linkage                | SE43 |         |   |   |   |   |
|                                   | Public health events processing       | SE44 |         |   |   |   |   |
|                                   | Management and control of key parts   | SE45 |         |   |   |   |   |
|                                   | Building monitoring                   | SE46 |         |   |   |   |   |
| Smart Infrastructure (SI)         | Life channel facilities monitoring    | SE51 |         |   |   |   |   |
|                                   | Smart personnel monitoring facilities | SE52 |         |   |   |   |   |
|                                   | Smart object monitoring facilities    | SE53 |         |   |   |   |   |
|                                   | Integrated system of smart safety     | SE54 |         |   |   |   |   |

| Dimension                             | Indicators                                   | Code | Scoring |   |   |   |   |
|---------------------------------------|----------------------------------------------|------|---------|---|---|---|---|
|                                       |                                              |      | 1       | 2 | 3 | 4 | 5 |
|                                       | Public facilities monitoring                 | SE55 |         |   |   |   |   |
|                                       | Smart environment monitoring                 | SE56 |         |   |   |   |   |
|                                       | Smart firefighting facilities                | SE57 |         |   |   |   |   |
| Emergency Measure (EM)                | Emergency duty                               | SE61 |         |   |   |   |   |
|                                       | Emergency warning                            | SE62 |         |   |   |   |   |
|                                       | Emergency rescue alarm                       | SE63 |         |   |   |   |   |
|                                       | Emergency shelter guidelines                 | SE64 |         |   |   |   |   |
|                                       | Emergency supplies reserve                   | SE65 |         |   |   |   |   |
|                                       | Emergency command and dispatch               | SE66 |         |   |   |   |   |
|                                       | Disaster risk map                            | SE67 |         |   |   |   |   |
| Safety Propaganda and Education (SPE) | Propaganda and education of emergency safety | SE71 |         |   |   |   |   |
|                                       | Training of community administrators         | SE72 |         |   |   |   |   |
| Others                                | New indicators suggested by the experts      | SE81 |         |   |   |   |   |
|                                       | ...                                          | ...  |         |   |   |   |   |

### 3. More suggestions of the expert.

Please fill in your suggestions on the selection of indicators in Table B-3.

**Table B-3** More suggestions on selecting evaluation indicators of smart community governance.

|  |
|--|
|  |
|--|

**Thanks a lot for your cooperation!**
