# Supplementary material
Source: MDPI journal article supplement (https://www.mdpi.com/2075-5309/13/2/476)
Supplement: s1 [file s1 › File S3-Detailed evaluation criteria for each indicator of smart community safety.pdf]

File S3

Table C-1 Details of the evaluation criteria for each indicator of smart community safety

| Dimension | Indicators | Values | Evaluation Criteria for each indicator                                                                                                                                                      |
|-----------|------------|--------|---------------------------------------------------------------------------------------------------------------------------------------------------------------------------------------------|
| SM        | SE11       | 45     | Smart community has a clear organization of smart community safety, and the specific work content of administrators is arranged.                                                            |
|           |            | 30     | The work meetings on smart community security are convened every year.<br>Note: 10 points for each work meeting.                                                                            |
|           |            | 25     | Organization is announced to community residents.                                                                                                                                           |
|           | SE12       | 70     | Special capital for smart community safety is established.                                                                                                                                  |
|           |            | 20     | The capital management system of smart community safety is established.                                                                                                                     |
|           |            | 10     | The change of capital is announced to the community residents.                                                                                                                              |
|           | SE13       | 60     | The rules and regulations for development of smart community safety are established.                                                                                                        |
|           |            | 20     | The linkage mechanism for smart community safety is developed.                                                                                                                              |
|           |            | 20     | The smart community safety-related activities are implemented according to the rules and regulations.                                                                                       |
|           | SE14       | 60     | The talent team with professional knowledge of safety management and emergency management has been established.                                                                             |
|           |            | 40     | The volunteer team with professional knowledge is established in smart communities.                                                                                                         |
|           | SE15       | 80     | A standardized and systematic electronic records archives is established to record the information of safety activities for the smart community.                                            |
|           |            | 20     | The information of archives is uploaded to the smart community management system in time.                                                                                                   |
| PS        | SE21       | 50     | The information safety system of smart community is established to protect the information in the smart community.                                                                          |
|           |            | 50     | There is no information safety accident in smart community in one year. The value of this indicator will be reduced when an information safety accident occurred.<br>Note: 10 point/time.   |
|           | SE22       | 40     | The platform data safety system is established in the smart community.                                                                                                                      |
|           |            | 30     | There is no platform data safety accident in smart community in one year. The value of this indicator will be reduced when a platform data safety accident occurred.<br>Note: 5 point/time. |
|           |            | 30     | Permissions for different data access are designed, the permissions of different people in the smart community are distinguished.                                                           |
|           | SE23       | 70     | The smart community management platform has a unified function of safety certification.                                                                                                     |
|           |            | 30     | The platform can design multiple access permissions, including community residents, community administrators, and enterprises.<br>Note: 10 points for each item.                            |

| Dimension | Indicators | Values | Evaluation Criteria for each indicator                                                                                                                                                                                                                                                                                                                                                                                                                                                                     |
|-----------|------------|--------|------------------------------------------------------------------------------------------------------------------------------------------------------------------------------------------------------------------------------------------------------------------------------------------------------------------------------------------------------------------------------------------------------------------------------------------------------------------------------------------------------------|
| EP        | SE31       | 50     | According to the emergency plan formulated by the government and the characteristics of the community, the contents of the emergency plan are timely implemented.                                                                                                                                                                                                                                                                                                                                          |
|           |            | 25     | The relevant information in that emergency plan is published to the residents of the smart community.                                                                                                                                                                                                                                                                                                                                                                                                      |
|           |            | 25     | Combined with the characteristics of the smart community, the implementation ways or plans of emergency plan are improved in one year.<br>Note: 5 point/time.                                                                                                                                                                                                                                                                                                                                              |
|           | SE32       | 52     | Emergency exercise are organized at least twice a year in smart communities.                                                                                                                                                                                                                                                                                                                                                                                                                               |
|           |            | 48     | Multiple people participate in community emergency exercise, including residents, enterprises, governments, property, social organizations, and volunteers.<br>Note: 8 points for each item.                                                                                                                                                                                                                                                                                                               |
| CPS       | SE41       | 70     | The mechanism of abnormal events recording in the smart community is established.                                                                                                                                                                                                                                                                                                                                                                                                                          |
|           |            | 30     | The community information of abnormal events recording is uploaded.<br>Note: 5 point/time.                                                                                                                                                                                                                                                                                                                                                                                                                 |
|           |            | 35     | The platform can establish information records and management services for special populations in smart communities.                                                                                                                                                                                                                                                                                                                                                                                       |
|           | SE42       | 35     | The platform can conduct emergency disposal with recording functions in case of emergency during the supervision of special people in the community such as 1) the person responsible for the accident, 2) mental patients, 3) pester and trouble visitors, 4) people released from prison, 5) people with records of theft, 6) people in community correction, 7) people serving sentences, 8) key drug addicts, 9) juvenile delinquents and 10) other potential threats. Note: 3.5 points for each item. |
|           |            |        |                                                                                                                                                                                                                                                                                                                                                                                                                                                                                                            |
|           |            |        |                                                                                                                                                                                                                                                                                                                                                                                                                                                                                                            |
|           | SE43       | 30     | The platform can conduct digital monitoring of special population in the community.                                                                                                                                                                                                                                                                                                                                                                                                                        |
|           |            | 50     | The platform can establish a multi-department (housing, fire, public security, traffic police, justice, law and order, meteorology, civil affairs, health and epidemic prevention, and other government departments) linkage mechanism for smart communities, which can deal with emergencies.<br>Note: 5 points for each item.                                                                                                                                                                            |
|           |            |        |                                                                                                                                                                                                                                                                                                                                                                                                                                                                                                            |
|           |            | 50     | Smart community multi- sectoral linkage mechanisms are used to successfully deal with emergencies.<br>Note: 10 point/time.                                                                                                                                                                                                                                                                                                                                                                                 |
|           | SE44       | 60     | When public health incidents occur, the emergency work mechanism is established in time through information technology, and related management services and information collection are carried out.                                                                                                                                                                                                                                                                                                        |
|           |            | 20     | A public health event processing database is established.                                                                                                                                                                                                                                                                                                                                                                                                                                                  |
|           |            | 20     | The information of the public health event processing database is uploaded to the community information platform in time,                                                                                                                                                                                                                                                                                                                                                                                  |

| Dimension | Indicators | Values | Evaluation Criteria for each indicator                                                                                                                                                                                                                                                 |
|-----------|------------|--------|----------------------------------------------------------------------------------------------------------------------------------------------------------------------------------------------------------------------------------------------------------------------------------------|
| SI        | SE45       | 40     | The platform aims to construct a 3D-based intelligent community management platform and video networking monitoring system, full coverage monitoring of key parts of the smart community.                                                                                              |
|           |            | 20     | The system platform can switch system images, control camera heads and lenses for video monitoring, display, recording and monitoring content playback, and identification and warning of dangerous behaviors. Note: 5 points for each item                                            |
|           |            | 20     | The platform can record image information, image number and location, date and event, etc., to ensure the integrity and security of recorded images, storage capacity and recording, playback bandwidth and retrieval.                                                                 |
|           |            | 20     | The key part of the monitoring information retention time is no less than 30 days.                                                                                                                                                                                                     |
|           | SE46       | 50     | The monitoring system of building structure safety is established.                                                                                                                                                                                                                     |
|           |            | 25     | The safety level of building structures in smart communities is more than Level III.                                                                                                                                                                                                   |
|           |            | 25     | The safety level of buildings in smart communities is more than Level B.                                                                                                                                                                                                               |
|           | SE51       | 60     | Smart monitoring facilities for life channels in the community were built, and relevant data were uploaded in time.                                                                                                                                                                    |
|           |            | 40     | Smart monitoring facilities can operate normally and maintain the equipment in time.                                                                                                                                                                                                   |
|           | SE52       | 36     | Smart personnel monitoring facilities and systems are established in the community.                                                                                                                                                                                                    |
|           |            | 14     | Smart monitoring facilities and systems operate normally, and timely warn in case of emergencies.                                                                                                                                                                                      |
|           |            | 14     | The data of smart monitoring facilities are complete and detailed, and communicate with the smart community platform in time.                                                                                                                                                          |
|           |            | 36     | Smart personnel monitoring facilities and systems are established, including smart visitor system, entertainment place monitoring, smart electronic access system, dangerous behavior monitoring, and so on.<br>Note: 6 points for each item                                           |
|           |            | 36     | Smart object monitoring facilities and systems are established in the community.                                                                                                                                                                                                       |
|           |            | 14     | Smart monitoring facilities and systems operate normally, and timely warn in case of emergencies.                                                                                                                                                                                      |
|           |            | 14     | The data of smart monitoring facilities are complete and detailed, and communicate with the smart community platform in time.                                                                                                                                                          |
|           | SE53       | 36     | Smart object monitoring facilities and systems are established, including motor vehicle monitoring, high-altitude parabolic monitoring, electric vehicle charging pile monitoring, overspeed alarm system, doorplate of VR code or QR code, and so on.<br>Note: 6 points for each item |

| Dimension | Indicators | Values | Evaluation Criteria for each indicator                                                                                                                                                                                                     |
|-----------|------------|--------|--------------------------------------------------------------------------------------------------------------------------------------------------------------------------------------------------------------------------------------------|
|           | SE54       | 50     | Integrated system of smart safety is established in the community to collect and count the data of each item,                                                                                                                              |
|           |            | 50     | The information is connected with the smart community management platform after data desensitization.                                                                                                                                      |
|           | SE55       | 36     | Smart public facilities monitoring system is established in the community.                                                                                                                                                                 |
|           |            | 14     | Smart monitoring facilities and systems operate normally, and timely warn in case of emergencies.                                                                                                                                          |
|           |            | 14     | The data of smart monitoring facilities are complete and detailed, and communicate with the smart community platform in time.                                                                                                              |
|           |            | 36     | Smart public facilities monitoring system is established, including manhole covers, water supply and drainage systems, power supply facilities, lighting facilities, garden irrigation systems, and so on.<br>Note: 6 points for each item |
|           |            | 36     | Smart environment facilities monitoring system is established in the community.                                                                                                                                                            |
|           |            | 14     | Smart monitoring facilities and systems operate normally, and timely warn in case of emergencies.                                                                                                                                          |
|           | SE56       | 14     | The data of smart monitoring facilities are complete and detailed, and communicate with the smart community platform in time.                                                                                                              |
|           |            | 36     | Smart environment facilities monitoring system is established, including water quality, air, soil, solid waste, etc.<br>Note: 6 points for each item                                                                                       |
|           |            | 40     | Smart firefighting facilities monitoring system is established in the community.                                                                                                                                                           |
|           | SE57       | 20     | Smart monitoring facilities and systems operate normally, and timely warn in case of emergencies.                                                                                                                                          |
|           |            | 30     | The data of smart monitoring facilities are complete and detailed, and communicate with the smart community platform in time.                                                                                                              |
|           |            | 10     | Key parts are monitored such as electric vehicle charging piles.                                                                                                                                                                           |
| EM        | SE61       | 30     | The emergency duty office is established, and the smart emergency management duty system and emergency duty terminal are established.                                                                                                      |
|           |            | 30     | A team of personnel on emergency duty was formed.                                                                                                                                                                                          |
|           |            | 20     | The relevant information on duty is connected to the smart community emergency management system,                                                                                                                                          |
|           |            | 20     | 24-hour duty and safety monitoring are implemented In the smart community.                                                                                                                                                                 |
|           | SE62       | 40     | Smart Emergency warning system is established in the community.                                                                                                                                                                            |
|           |            | 30     | Smart monitoring facilities and systems operate normally, and timely warn in case of emergencies.                                                                                                                                          |
|           |            | 30     | Smart system can successfully warn emergencies.<br>Note: 5 points / time                                                                                                                                                                   |
|           | SE63       | 50     | Emergency help buttons are installed in community public areas.                                                                                                                                                                            |

| Dimension | Indicators | Values | Evaluation Criteria for each indicator                                                                                                                                                                                                                                            |
|-----------|------------|--------|-----------------------------------------------------------------------------------------------------------------------------------------------------------------------------------------------------------------------------------------------------------------------------------|
|           |            | 30     | The emergency rescue alarm is connected with the property management center and the emergency control center.                                                                                                                                                                     |
|           |            | 10     | An emergency alarm system is installed in the house to help community residents get in touch with medical institutions in time.                                                                                                                                                   |
|           |            | 10     | Emergency information can be pushed to the emergency contact of the parties.                                                                                                                                                                                                      |
|           | SE64       | 35     | Emergency shelter guidelines is established in the community, such as Signs of emergency shelters Images of Emergency Evacuation, Distribution map of emergency shelters, etc..<br>Note: 5 points for each item                                                                   |
|           |            | 35     | Relevant information of emergency shelter is uploaded to the smart community information platform, and a dynamic path map is formed.                                                                                                                                              |
|           |            | 30     | Community residents can see clear and accurate maps of emergency shelter guidelines through the platform.                                                                                                                                                                         |
|           | SE65       | 50     | An emergency material reserve management platform is established to monitor and manage emergency materials.                                                                                                                                                                       |
|           |            | 25     | There is clear information on emergency materials reserve on the information platform, which is convenient for community residents to check.                                                                                                                                      |
|           |            | 25     | Emergency tools are set up in the community, such as community miniature fire stations, emergency communication backpacks and emergency equipment.                                                                                                                                |
|           | SE66       | 100    | The emergency mechanism in the smart community is established, including housing, fire, public security, traffic police, justice, law and order, meteorology, civil affairs, health and epidemic prevention, and other government department. Note: 10 points for each item       |
|           | SE67       | 50     | The disaster risk map of smart community is designed and operated normally.                                                                                                                                                                                                       |
|           |            | 25     | The community disaster risk map is clearly marked and updated in time, the risk of each natural disaster is displayed, which counts 5 points.                                                                                                                                     |
|           |            | 25     | The information of human factor risk is added in the community disaster risk map.                                                                                                                                                                                                 |
| SPE       | SE71       | 28     | Community safety knowledge can be released through 1) community radio, 2) electronic information screen, 3) information bulletin board or bulletin board, 4) portal website, 5) WeChat public accounts, 6) mobile apps, and 7) WeChat mini programs. Note: 4 points for each item |
|           |            | 28     | Safety knowledge is propagandized through the combination of online activities and offline activities.                                                                                                                                                                            |
|           |            | 24     | Different contents of safety propaganda and education are provided for different community groups.                                                                                                                                                                                |
|           |            | 10     | Safety education materials are uploaded to the smart community information platform to ensure that community residents can check the contents of safety education at any time.                                                                                                    |
|           |            | 10     | Safety education materials are updated in time.                                                                                                                                                                                                                                   |

| Dimension | Indicators | Values | Evaluation Criteria for each indicator                                                                                                                                                                                                                                                                      |
|-----------|------------|--------|-------------------------------------------------------------------------------------------------------------------------------------------------------------------------------------------------------------------------------------------------------------------------------------------------------------|
|           |            | 52     | Community administrators are trained in the knowledge and skills of safety management and emergency management.                                                                                                                                                                                             |
|           |            | 24     | Property administrators are trained in the knowledge and skills of safety management and emergency management.<br>Note: 5 points / time                                                                                                                                                                     |
|           | SE72       | 24     | Administrators of nine types of small places in the knowledge and skills of safety management and emergency management.<br>Note: 5 points / time<br>"nine types of small places" includes: restaurants, factory, shopping mall, entertainment place, school or kindergarten, hotel, public baths, hospital. |
