# Supplementary material
Source: MDPI journal article supplement (https://www.mdpi.com/2075-5309/13/2/476)
Supplement: s1 [file s1 › File S4-The rankings of the five smart communities on each indicator.pdf]

**File S4**

The rankings of the five smart communities on each indicator

**Table 1.** The rankings of the five smart communities on each indicator

| <b>Community</b><br><b>Indicators</b> | <b>Yucun community</b><br><b>(N1)</b> | <b>Baolong community</b><br><b>(N2)</b> | <b>Fuguang community</b><br><b>(N3)</b> | <b>Huilingpu community</b><br><b>(N4)</b> | <b>Nanyuan community</b><br><b>(N5)</b> |
|---------------------------------------|---------------------------------------|-----------------------------------------|-----------------------------------------|-------------------------------------------|-----------------------------------------|
| Organizational safeguard              | 1                                     | 5                                       | 3                                       | 3                                         | 2                                       |
| Capital safeguard                     | 1                                     | 1                                       | 3                                       | 4                                         | 4                                       |
| Institutional safeguard               | 2                                     | 2                                       | 5                                       | 2                                         | 1                                       |
| Talent safeguard                      | 4                                     | 1                                       | 4                                       | 3                                         | 2                                       |
| Operation safeguard                   | 1                                     | 1                                       | 3                                       | 3                                         | 3                                       |
| Information safety safeguard          | 1                                     | 1                                       | 5                                       | 4                                         | 3                                       |
| Platform data safety                  | 1                                     | 2                                       | 4                                       | 2                                         | 5                                       |
| Platform access safety                | 1                                     | 2                                       | 5                                       | 2                                         | 2                                       |
| Emergency plan implementing           | 1                                     | 3                                       | 1                                       | 5                                         | 4                                       |
| Emergency exercise                    | 1                                     | 3                                       | 5                                       | 4                                         | 2                                       |
| Abnormal events recording             | 1                                     | 4                                       | 3                                       | 5                                         | 2                                       |
| Special population management         | 1                                     | 3                                       | 5                                       | 3                                         | 2                                       |
| Multi-sectoral linkage                | 1                                     | 2                                       | 2                                       | 4                                         | 4                                       |
| Public health events processing       | 1                                     | 2                                       | 2                                       | 2                                         | 5                                       |
| Management and control of key parts   | 1                                     | 4                                       | 3                                       | 5                                         | 2                                       |
| Building monitoring                   | 1                                     | 2                                       | 2                                       | 4                                         | 4                                       |
| Life channel facilities monitoring    | 1                                     | 1                                       | 4                                       | 4                                         | 1                                       |
| Smart personnel monitoring facilities | 1                                     | 3                                       | 3                                       | 5                                         | 2                                       |
| Smart object monitoring facilities    | 1                                     | 4                                       | 2                                       | 2                                         | 5                                       |
| Integrated system of smart safety     | 1                                     | 3                                       | 1                                       | 3                                         | 3                                       |
| Public facilities monitoring          | 1                                     | 2                                       | 2                                       | 4                                         | 4                                       |
| Smart environment monitoring          | 1                                     | 2                                       | 5                                       | 3                                         | 4                                       |
| Smart firefighting facilities         | 1                                     | 2                                       | 3                                       | 3                                         | 5                                       |
| Emergency duty                        | 1                                     | 3                                       | 5                                       | 3                                         | 1                                       |
| Emergency warning                     | 1                                     | 2                                       | 5                                       | 4                                         | 3                                       |
| Emergency rescue alarm                | 1                                     | 2                                       | 3                                       | 4                                         | 5                                       |
| Emergency shelter guidelines          | 1                                     | 5                                       | 1                                       | 1                                         | 4                                       |

| Community<br>Indicators                         | Yucun community | Baolong community | Fuguang community | Huilongpu community | Nanyuan community |
|-------------------------------------------------|-----------------|-------------------|-------------------|---------------------|-------------------|
|                                                 | (N1)            | (N2)              | (N3)              | (N4)                | (N5)              |
| Emergency supplies reserve                      | 1               | 4                 | 1                 | 4                   | 1                 |
| Emergency command and dispatch                  | 1               | 1                 | 3                 | 4                   | 4                 |
| Disaster risk map                               | 1               | 3                 | 2                 | 3                   | 3                 |
| Propaganda and education of<br>emergency safety | 1               | 4                 | 4                 | 2                   | 2                 |
| Training of community administrators            | 1               | 3                 | 3                 | 5                   | 1                 |
